# Supplementary material for: Exocyclic coordination chemistry of an O2S2-macrocycle with copper(i), mercury(ii) and palladium(ii) ions
Source: Royal Society of Chemistry journal article supplement (doi:10.1039/c3ce41573b), 2013-01-01
Supplement: c3ce41573b.pdf [file c3ce41573b.pdf]

## **Electronic Supplementary Information**

**For**

### **Exocyclic coordination chemistry of an O<sub>2</sub>S<sub>2</sub>- macrocycle with copper(I), mercury(II) and palladium(II) ions**

Seulgi Kim, Eunji Lee, Ki-Min Park and Shim Sung Lee\*

*Department of Chemistry and Research Institute of Natural Sciences,  
Gyeongsang National University, Jinju 660-701, S. Korea*

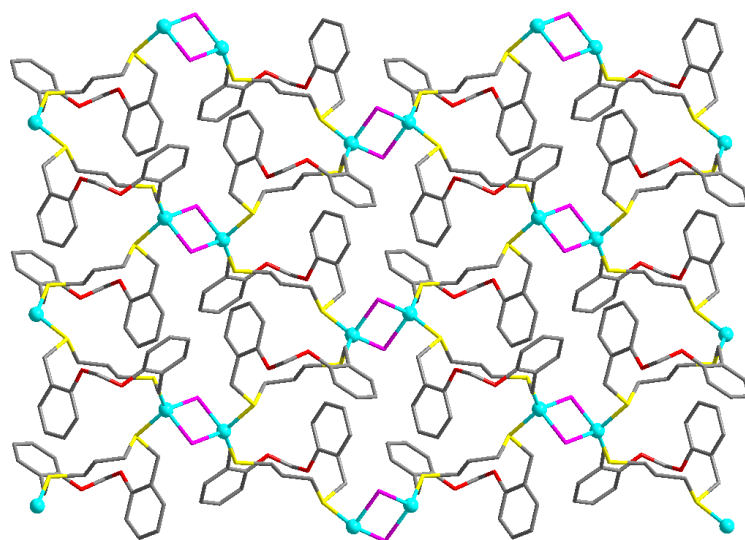

(a)

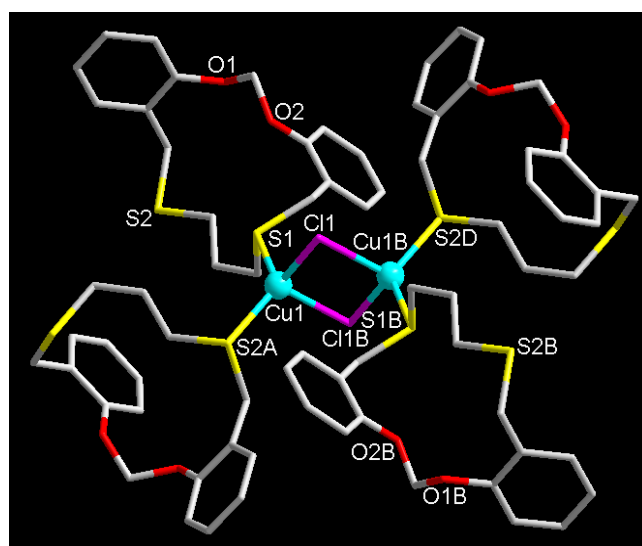

(b)

**Fig. S1** 2-D polymeric structure of **1**,  $[(\text{Cu}_2\text{Cl}_2)\text{L}]_n$ : (a) fishnet-type network and (b) basic coordination unit.

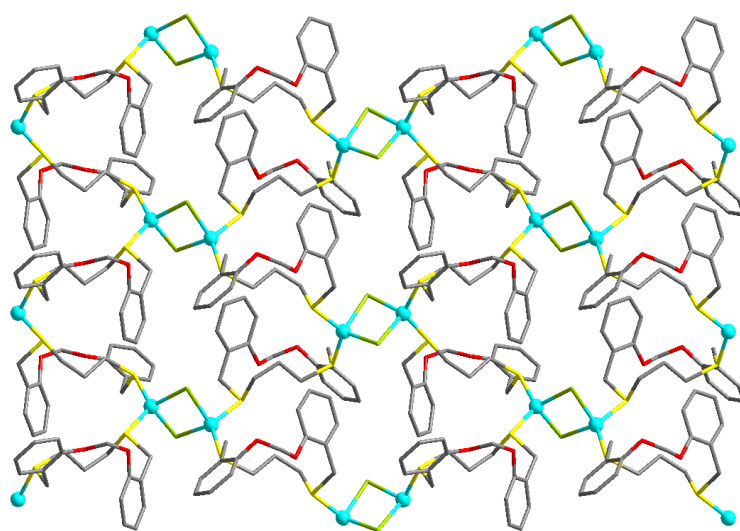

(a)

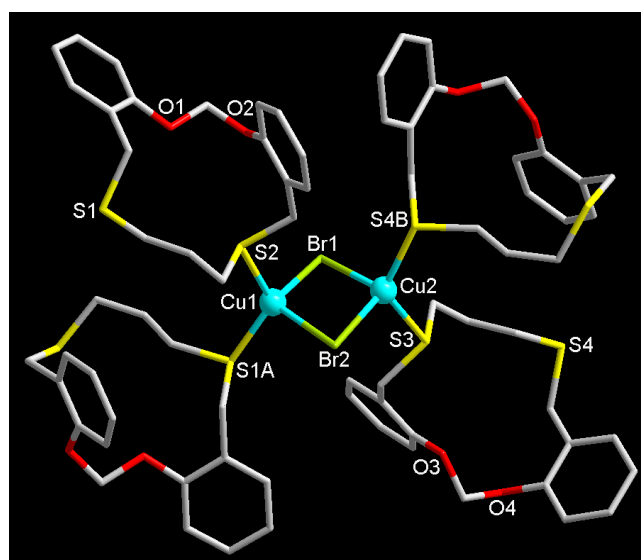

(b)

**Fig. S2** 2-D polymeric structure of **2**,  $[(\text{Cu}_2\text{Br}_2)\text{L}]_n$ : (a) fishnet-type network and (b) basic coordination unit.

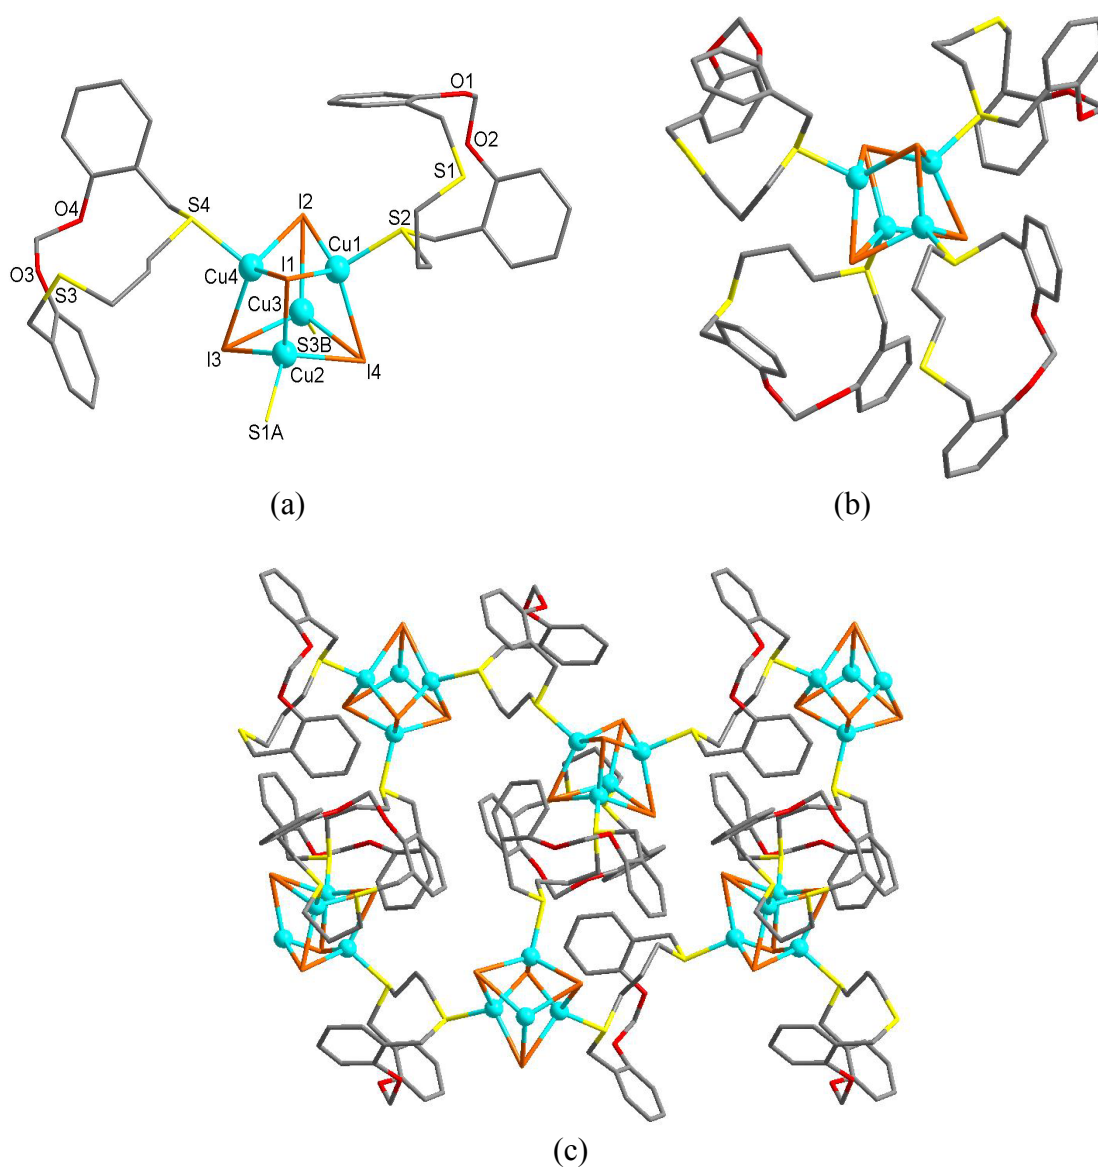

**Fig. S3** A preliminary crystal structure of **3**,  $\{[(\text{Cu}_4\text{I}_4)\text{L}](\text{H}_2\text{O})_{2.5}\}_n$ : (a) the basic coordination unit, (b) the coordination environment of the  $\text{Cu}_4\text{I}_4$ -cubane core and (c) the 2-D network.

*Note for the crystal structure of 3:* since the structural refinement in the X-ray analysis was not completed (e.g. NPD) because of the poor crystallinity and the slow decomposition in the air, it shows large *R*-values (see Table S2).

**Table S1** Selected bond lengths (Å) and bond angles (°) for **3**

|                                                                                                                        |          |            |          |
|------------------------------------------------------------------------------------------------------------------------|----------|------------|----------|
| Cu1-S2                                                                                                                 | 2.290(1) | Cu1-I2     | 2.704(1) |
| Cu1-I1                                                                                                                 | 2.636(1) | Cu1-I4     | 2.730(1) |
| Cu2-S1A                                                                                                                | 2.363(1) | Cu2-I3     | 2.659(1) |
| Cu2-I4                                                                                                                 | 2.652(1) | Cu2-I1     | 2.731(1) |
| Cu3-S3B                                                                                                                | 2.285(1) | Cu3-I3     | 2.657(1) |
| Cu3-I2                                                                                                                 | 2.645(1) | Cu3-I4     | 2.719(1) |
| Cu4-S4                                                                                                                 | 2.283(1) | Cu4-I3     | 2.703(1) |
| Cu4-I1                                                                                                                 | 2.688(1) | Cu4-I2     | 2.734(1) |
| <hr/>                                                                                                                  |          |            |          |
| S2-Cu1-I1                                                                                                              | 114.4(1) | S2-Cu1-I4  | 102.8(1) |
| S2-Cu1-I2                                                                                                              | 101.8(1) | I1-Cu1-I4  | 107.0(1) |
| I1-Cu1-I2                                                                                                              | 115.3(1) | Cu3-Cu1-I4 | 60.7(1)  |
| Cu3-Cu1-I2                                                                                                             | 59.2(1)  | Cu4-Cu1-I4 | 106.5(1) |
| Cu4-Cu1-I2                                                                                                             | 61.3(1)  | I2-Cu1-I4  | 115.0(1) |
| S1A-Cu2-I4                                                                                                             | 113.0(1) | S1A-Cu2-I1 | 100.5(1) |
| S1A-Cu2-I3                                                                                                             | 107.5(1) | I4-Cu2-I1  | 106.5(1) |
| I4-Cu2-I3                                                                                                              | 111.9(1) | I3-Cu2-I1  | 117.0(1) |
| S3B-Cu3-I2                                                                                                             | 106.3(1) | S3B-Cu3-I4 | 104.4(1) |
| S3B-Cu3-I3                                                                                                             | 104.7(1) | I2-Cu3-I4  | 117.4(1) |
| I2-Cu3-I3                                                                                                              | 113.0(1) | I3-Cu3-I4  | 109.9(1) |
| S4-Cu4-I1                                                                                                              | 105.8(1) | S4-Cu4-I2  | 104.4(1) |
| S4-Cu4-I3                                                                                                              | 107.3(1) | I1-Cu4-I2  | 112.6(1) |
| I1-Cu4-I3                                                                                                              | 117.0(1) | I3-Cu4-I2  | 108.8(1) |
| <hr/>                                                                                                                  |          |            |          |
| Symmetry operations: (A) $-x+3/2, y-1/2, -z+3/2$ (B) $x, -y+1, z-1/2$ (C) $-x+3/2, y+1/2, -z+3/2$ (D) $x, -y+1, z+1/2$ |          |            |          |

**Table S2** Crystal and experimental data of **3**

| <b>3</b>                                    |                                        |
|---------------------------------------------|----------------------------------------|
| Formula                                     | $C_{36}H_{45}Cu_4I_4O_{6.50}S_4$       |
| Formula weight                              | 1471.72                                |
| Temperature (K)                             | 173(2)                                 |
| Crystal system                              | Monoclinic                             |
| Space group                                 | $C2/c$                                 |
| $Z$                                         | 8                                      |
| $a$ (Å)                                     | 37.428(3)                              |
| $b$ (Å)                                     | 17.7996(16)                            |
| $c$ (Å)                                     | 18.6435(16)                            |
| $\alpha$ (°)                                | 90                                     |
| $\beta$ (°)                                 | 118.5550(10)                           |
| $\gamma$ (°)                                | 90                                     |
| $V$ (Å <sup>3</sup> )                       | 10909.5(16)                            |
| $D_{\text{calc}}$ (g/cm <sup>3</sup> )      | 1.792                                  |
| $2\theta_{\text{max}}$ (°)                  | 52                                     |
| $R_1, wR_2$ [ $I > 2\sigma(I)$ ]            | 0.1323, 0.3239                         |
| $R_1, wR_2$ [all data]                      | 0.1835, 0.3696                         |
| No. of reflection<br>used [ $>2\sigma(I)$ ] | 10717<br>[ $R_{\text{int}} = 0.1403$ ] |
